# Supplementary material
Source: PubMed Central journal article supplement (PMC1317667)

## **Supplementary methods**

### **Polymerase chain reaction (PCR) method**

Sequence information for human primers was derived from Ensembl Genome Browser. The first gene candidate corresponds to accession number (ENST\_00000333071), the second (ENST\_00000332871) and the third (ENST\_00000302973). The primers were following: for the first gene candidate forward primer (HF1) 5'-TCTATAGGTGCCTGGTGC-3' and reverse primer (HR1) 5'-GTGCATCTCCATAGCCTG-3' with the resulting PCR product of 372 bp; for the second gene candidate forward primer (HF1) and reverse primer (HR2) 5'-CTCTCTCCAGCATGGCAT-3' with the resulting product of 298 bp; for the third gene candidate forward primer (HF2) 5'-CTTCCGAGGCTATGACTC-3' and reverse primer (HR3) 5'-AGATTCAGTACTGAGAGCCCTG-3' with the resulting product of 380 bp. All gene candidates should have been recognized by forward primer (HF2) and reverse primer (HR4) 5'-AGTAGCTCGAGGTGTTGG-3' with the resulting products of 444 bp for the first, 416 bp for the second and 425 bp for the third gene candidate.

The primers were produced by Sigma Genosys (Cambridge, UK) and all the other reagents were from BD Biosciences except for the dNTP mix that was from Finnzymes (Espoo, Finland). 5 ng of cDNA was used as template. The PCR reactions were carried out on a thermal cycler (Gene Amp PCR system 9700, Applied Biosystems, Foster City, CA). For mouse cDNA studies a touchdown PCR protocol was carried out: it consisted of 94°C denaturation step for 1 min followed by 3 cycles of 94°C for 30 s, annealing at 60°C for 30 s, extension at 68°C for 1 min 30 s, followed by 4 cycles where annealing temperature was 58°C, followed by 26 cycles where annealing temperature was 56°C and finally extension at 68°C for 3 min. For human cDNA studies a single step protocol was used that consisted of 94°C for 1 min followed by 33 cycles of 94°C for 30 s, 54°C for 30 s and 72°C for 1 min 30 s and finally 72°C for 3 min. Primers HF2 and HR4 were used to study all the 15 human tissues and in addition, primer pairs HF1/HR1, HF1/HR2 and HF2/HR3 were used to study kidney, brain and heart.

### **Sequencing of the PCR products**

For the sequencing, PCR products were first purified with a GFX PCR DNA and Gel Band Purification Kit (Amersham Biosciences, Poole, UK) from the gel, then cloned into pGEM-T Easy Vector System I (Promega, Madison, WI) and finally the vectors were transformed into TOP10 cells (Invitrogen) according to manufacturers' instructions. The plasmids were purified using the Qiagen Spin Miniprep Kit (Hilden, Germany) following the protocol given by the manufacturer. The sequencing was carried out using ABI PRISM Big Dye Terminator Cycle Sequencing Ready

Reactions Kit version 3.1 (Applied Biosystems). The sequencing was performed in both directions and the primers were designed for vector's SP6 and T7 promoter regions and ordered from Sigma Genosys. 5  $\mu$ l of purified plasmid was mixed with 4  $\mu$ l of Big Dye mix and 1.6 pmol of primers were added. The reactions were amplified by cycle sequencing on a thermal cycler (Gene Amp PCR system 9700) according to the manufacturer's protocol. The products were purified by ethanol precipitation, resuspended in HiDi formamide (Applied Biosystems) and denatured according to the manufacturer's instructions. The sequencing was performed with an ABI PRISM Genetic Analyser instrument 9100 (Applied Biosystems).

**Supplementary Figure 1.** The alignment contains all the gene candidates for CA15 that were found in the human and chimpanzee genomes. A protein sequence was constructed by using the functional mouse CA XV and the alignment in Figure 1. For clarity, only the construction of one protein sequence is shown; it corresponds to human gene candidate 1 (hum\_site1). The yellow color shows the nucleotide sequence used to make the construct. The errors in the sequences are highlighted with green color. All the gene candidates contain frameshifts that would destroy the protein sequence for CA XV: the frameshifts are found at positions 79-80, 283, 566-569. The exon 8 in each gene is disrupted by an AluY repeat sequence. Exon 4 is also split into two exons (named A and B), and the intron between them does not conform to the GT-AG rule (nucleotide 325). In addition, every gene candidate has its own frameshift(s), shown in green. These errors confirm that humans and chimpanzees are not able to produce a functional CA XV protein.

- █ = the nucleotide sequence that has been translated to amino acids  
█ = frameshifts or other disrupting features in the sequence

```

                                           1 EXON 1
hum_site2  gtccttcctagctgctggctgccactgagccacgcacgcccctggcatcATGCTCGCCTTG
hum_site3  gtccttcctagctgctggctgccactgagccacgcacgcccctggcatcATGCTCGCCTTG
pan_site3  gtccttcctagctgctggctgccactaagccacgcacgcccctggcatcATGCTCGCCTTG
hum_site1  gtccttcctagctgctggctgccactgagccacgcacgcccctggcatcATGCTCGCCTTG
pan_site1  gtccttcctagctgctggctgccactgagccgaatcnnnnnnnnnnnnnnnnnnnnnnnnnnnnnnnn
*****
M L A L

          20           40           60
hum_site2  CAGTGCAGCTGGTGTGGCGCAGACTCTGAGAGTGAGCACCAGGACTCTTCCCgtctggtc
hum_site3  CGGTGCAGCTGGTGTGGTGCAGACTCTGAGAGTGAGCACCAGGACTCTTCCCgtctggtc
pan_site3  CGGTGCAGCTGGTGTGGCGCAGACTCTGAGAGTGAGCACCAGGACTCTTCCCatctggcc
hum_site1  CGGTGCAGCTGGTGTGGCGCAGACTCTGAGAGTGAGCACCAGGACTCTTCCtgtctggcc
pan_site1  NNNNNNNNNNNNNNNNNNNNNNNNNNNNNNNNNNNNNNNNNNNNNNNNNNNNNNNnnnnnnnn
* ***** *
R C S W C G A D S E S E H Q D S S

          80 EXON 2           100           120
hum_site2  .....ctatagGTGCCTGGTGCTA--CGACTCCCAGGACCCCAAGTGTGgtgaggac.
hum_site3  .....ctatagGTGCCTGGTGCTA--CGACTCCCAGGACCCCAAGTGTGgtgaggac.
pan_site3  .....ctatagGTGCCTGGTGCTAATACGACTCCCAGGACCCCAAGTGTGGtaggagac.
hum_site1  .....ctatagGTGCCTGGTGCTA--TGACTCCCAGGACCTCAAGTATGgtgaggac.
pan_site1  .....nnnnnnnnnnnnnnnnnnnnnnnnnnnnnnnnnnnnnnnnnnnnnnnnnnnnnn
* ***** *
A W C Y D S Q D L K Y

          EXON 3   130           140
hum_site2  .....tccagcagTCCCCACCCACTGGA-AGAAGCTGGCCCC-TGCCTGTGGGGGCCCA
hum_site3  .....tccagcagTCCCCACCCACTGGA-AGAAGCTGGCCCC-TGCCTGTGGGGGCCCA
pan_site3  .....tccagcagTCCCCACCCACTGGAAGAAGCTGGCCCC-TGCCTGTGGGGGCCCA
hum_site1  .....tccagcagTCCCCACCCACTGGA-AGAAGCTGGCCCCGTGCCTGTGGGGGCCCA
pan_site1  .....nnnnnnnnnnnnnnnnnnnnnnnnnnnnnnnnnnnnnnnnnnnnnnnnnnnnnn
* ***** *
P T H W K K L A P A C G G P

          160           180           200
hum_site2  GGCCAGTCCCTCATCGACATTGACTTTTACAGGGTCCGGCGGAACCTCTACCCTAGGGCCC
hum_site3  GGCCAGTCCCTCATCGACATTGACTTTTACAGGGTCCGGCGGAACCTCTACCCTAGGGCCC
pan_site3  GGCCAGTCCCTCATCGACATTGACTTTTACAGGGTCCGGCGGAACCTCTACCCTAGGGCCC
hum_site1  GGCCAGTCCCTCATCAACATTGACTTTTACAGGGTCCGGCGGAACCTCTACCCTAGGGCCC
pan_site1  NNNNNNNNNNNNNNNNNNNNNNNNNNNNNNNNNNNNNNNNNNNNNNNNNNNNNNNnnnnnnnn
* ***** *
G Q S L I N I D F H R V R R N S T L G P

          220           240           260
hum_site2  TTCATCTTCCGA-GGCTATGACTCAGCACCTCCAGGCCCTTGGACCCTGGAGAATGACAG
hum_site3  TTCATCTTCCGA-GGCTATGACTCAGCACCTCCAGGCCCTTGGACCCTGGAGAATGACAG
pan_site3  TTCATCTTCCAAAGGCTATGACTCAGCACCTCCAGGCCCTTGGACCCTGGAGAATGACAG
hum_site1  TTCATCTTCCGA-GGCTATGACTCAGCACCTCCAGGCCCTTGGACCCTGGAGAATGACAG
pan_site1  NNNNNNNNNNNNNNNNNNNNNNNNNNNNNNNNNNNNNNNNNNNNNNNNNNNNNNNnnnnnnnn
* ***** *
F I F R G Y D S A P P G P W T L E N D S
  
```

280 300 EXON 4A 320  
hum\_site2 CCACACAgtcagcac.....catgagagTCCTGAGTGTACACAGGGACCAGgacc  
hum\_site3 CCACACAgtcagcac.....catgagagTCCTGAGTGTACACAGGGACCAGgacc  
pan\_site3 CCACACAgtcagcac.....catgagagTCCTGCGTGTACACAGGGACCAGgacc  
hum\_site1 CCACACAgtcagcac.....catgagagTCCTGCGTGTACACAGGGACCAGgacc  
pan\_site1 NNNNNNNNNnnnnnnnn.....nnnnnnnnNNNNNNNNNNNNNNNNNNNNNNnnnn  
\*\*\*\*\*  
H T L L R V H R D Q

340 EXON 4B 360  
hum\_site2 cct.....atcctcagAACACCTGGAGATTGGGAGGCTGGGCTGCTGTTGCCTGTC  
hum\_site3 cct.....atcctcagAACACCTGGAGATTGGGAGGCTGGGCTGCTGTTGCCTGTC  
pan\_site3 cct.....atcctcagAACACCTGGAGATTGGGAGGCTGGGCTGCTGTTGCCTGTC  
hum\_site1 cct.....atcctcagAACACCTGGAGATTGGGAGGCTGGGCTGCTGTTGCCTGTC  
pan\_site1 nnn.....atcctcagAACACCTGGAGATTGGGAGGCTGGGCTGCTGTTGCCTGTC  
\*\*\*  
N H L E I W E A G L L L P V

400 420  
hum\_site2 TACCGCGCACTGCGGCTGCACATCAGCTGGGGGCGGGGGGGGGCCCGAGGCGAGCAGAC  
hum\_site3 TACCGCGCACTGCGGCTGCACATCAGCTGGGGGCGGGGGG--GCCCAGGCGAGCAGAC  
pan\_site3 TACCGCGCACTGCGGCTGCACATCAACTGGGGGTGGGGGG--CCCAGGCGAGCAGAC  
hum\_site1 TACCGCGCACTGCGAGCTGCACCTCAACTGCCGGCGGTGGGGGGGGCCCGAGGCGAGCAGAC  
pan\_site1 TACCGCGCACTGCGGCTGCACCTCAACTGGGGGTGGGGGG--CCCAGGCGAGCAGAC  
\*\*\*\*\*  
Y R A L Q L H F N C R R W G G P R R A D

460 480  
hum\_site2 TCAGAGCACAGCCTGGACAGGACGCGCCAGGCTATGGAGgtagacttg.....acccc  
hum\_site3 TCGGAGCACAGCCTGGACAGGACGCGCCAGGCTATGGAGgtagacttg.....acccc  
pan\_site3 TCACAGCACAGCCTGGACAGGACGCGCCAGGCTATGGAGgtagacttg.....acccc  
hum\_site1 TCGGAGCACAGCCTGGACAGGACGCGCCAGGCTATGGAGgtagactcg.....acccc  
pan\_site1 TCGGAGCACAGCCTGGACAGGACGCGCCAGGCTATGGAGgtagactcg.....acccc  
\*\* \*\*\*\*\* \*  
S E H S L D R Q R Q A M E

500 EXON 5 520 540  
hum\_site2 cagATGCATGTGGTCCACAGTAACACAAAGTACCAGAGCATGGAGGAGGCACCACGCCAC  
hum\_site3 cagATGCATGTGGTCCACAGTAACACAAAGTACCAGAGCATGGAGGAGGCACCACGCCAC  
pan\_site3 cagATGCACGTGGTCCACAGTAACACAAAGTACCAGAGCATGGAGGAGGCACCACACCAC  
hum\_site1 cagATGCACGTGGTCCACAGTAACACAAAGTACCAGAGCATGGAGGAGGCACCACGCCAC  
pan\_site1 cagATGCACGTGGTCCACAGTAACACAAAGTACCAGAGCATGGAGGAGGCACCACGCCAC  
\*\*\*\*\*  
M H V V H S N T K Y Q S M E E A P R H

560 580 600  
hum\_site2 GGTGATGGGCTCGAGTGCAGGCCCTGCTGCTGGAGGTGCTGCTGGCGgtgaagc....  
hum\_site3 GGTGATGGGCTCGAGTGCAGGCCCTGCTGCTGGAGTTGCTGCTGGCGgtgaagc....  
pan\_site3 GGTGATGGGCTCGAGTGCAGGCCCTGCTGCTGGAGGTGCTGCTGGCGgtgaagc....  
hum\_site1 GGTGATGGGCTCGAGTGCAGGCCCTGCTGCTGGAGGTGCTGCTGGCGgtgaagc....  
pan\_site1 GGTGATGGGCTCGAGTGCAGGCCCTGCTGCTGGAGGTGCTGCTGGCGgtgaagc....  
\*\*\*\*\*  
G D G L A L L L E V L L A

620 EXON 6 640 660  
hum\_site2 ...cctcccagGAGCAGGACTGTAGCAACACCAACTTCTGCGCCATAGTGTGCGGCTTGA  
hum\_site3 ...cctcccagGAGCAGGACTGTAGCAACACCAACTTCTGCGCCATAGTGTGCGGCTTGA  
pan\_site3 ...cctcccagGAGCAGGACTGTAGCAACACCAACTTCTGCGCCATAGTGTGCGGCTTGA  
hum\_site1 ...cctcccagGAGCAGGACTGTAGCAACACCAACTTCTGCGCCATAGTGTGCGGCTTGA  
pan\_site1 ...cctcccagGAGCAGGACTGTAGCAACACCAACTTCTGCGCCATAGTGTGCGGCTTGA  
\*\*\*\*\*  
E Q D C S N T N F C A I V S G L

680 700 EXON 7  
hum\_site2 GGAAGGTGCCTGAGCCAGgtgaggag.....gctctcagTGAATCTGATGTCCACCTT  
hum\_site3 GGAAGGTGCCTGAGCCAGgtgaggag.....gctctcagTGAATCTGAGGTCCACCTT  
pan\_site3 GGAAGGTGCCTGAGCCGGgtgaggag.....gctttcagGANNNNNNNNNNNNNNNN  
hum\_site1 GGAAGGTGCCTGAGCCAGgtgaggag.....gctctcagTGAATCTGATGTCCACCTT  
pan\_site1 GGAAGGTGCCTGAGCCGGgtgaggag.....gctttcagTGAATCTGATGTCCACCTT  
\*\*\*\* \*\*\*\*\*  
R K V P E P V N L M S T F

720 740 760  
hum\_site2 CTTCTGCTGGCGTCGATGCGGCCAACACCTCGAGCTACTGTCGCTTCGCTGGGTCACT  
hum\_site3 CTTCTGCTGGCGTCGATGCGGCCAACACCTCGAGCTACTGTCGCTTCGCTGGGTCACT  
pan\_site3 NNNNNNNNNNNNNNNNNNNNNNNNNNNNNNNNNNNNNNNNNNNNNNNNNNNNNNNNNNNNN  
hum\_site1 CTTCCCGCTGGCGTCGATGCGGCCAACACCTCGAGCTACTGTCGCTTCGCTGGGTCACT  
pan\_site1 CTTCCCGCTGGCGTCGATGTCGCCAACATCTCGAGCTACTGTCGCTTTGCTGGGTCACT  
\*\*\*\*\*  
F P L A S M R P N T S S Y C R F A G S L

780 800 820  
hum\_site2 GACCCCGCTGACTGCGAGCCCACGGTGTCTGGACCGTCTTCGAGGACCCCATACCCAT  
hum\_site3 GACCCCGCTGACTGCGAGCCCACGGTGTCTGGACCGTCTTCGAGGACCCCATACCCAT  
pan\_site3 NNNNNNNNNNNNNNNNNNNNNNNNNNNNNNNNNNNNNNNNNNNNNNNNNNNNNNNNNNNNN  
hum\_site1 GACCCCGCTGACTGCGAGCCCACGGTGTCTGGACCGTCTTCGAGGACCCCATACCCAT  
pan\_site1 GACCCCGCTGACTGTGAGCCCACGGTGTCTGGACCGTCTTCGAGGACCCCATACCGCT  
\*\*\*\*\*  
T P P D C E P T V L W T V F E D P I P I

840 860 EXON 8A 880  
hum\_site2 CCGGTGGGTGCAGgtggagc.....accctcagATGACCCTGTTCACACC-GTGCCC  
hum\_site3 CCGGTGGGTGCAGgtggagc.....accctcagATGACCCTGTTCACACG-GTGCCC  
pan\_site3 NNNNNNNNNNNNNNNNNNNNNNNNNNNNNNNNNNNNNNNNNNNNNNNNNNNNNNNNNNNNN  
hum\_site1 CCGGTGGGTGCAGgtggagc.....accctcagATGACCCTGTTCACACC-CTGCCC  
pan\_site1 CCGGTGGGTGCAGgtggagc.....accctcagATGACCCTGTTCACACC-GTGCCC  
\*\*\*\*\*  
R W V Q M T L F Y T L P

900 1000 1020  
hum\_site2 CAGGCTGGACCTCCCACTTTACACCCATAC-CGCTCACGGGTAACCTCCGCCACAGCA  
hum\_site3 CAGGCTGGACCTCCCACTTTACACCCATAC-CGCTCACGGGTAACCTCCGCCACAGCA  
pan\_site3 -----  
hum\_site1 CAGGCTGGACCTCCCACTTTACACCCATAC-CGCTCACGGGTAACCTCCGCCACAGCA  
pan\_site1 CAGGCTGGACCTCCCACTTTACACCCATAC-CGCTCACGGGTAACCTCCGCCACAGCA  
\*\*\*\*\*  
Q A G P S H F H P I P L T G N F R P Q Q

1040 1060 1080  
hum\_site2 GCCTC-----ttttttttttgagacgg-ggtcttgcctgtgtgcgccag.....  
hum\_site3 GCCTC-----ttttttttttgagacgg-ggtcttgcctgtgtgcgccag.....  
pan\_site3 -----cttttctttgagacgg-ggacttgcctgtgtgcgccag.....  
hum\_site1 GCCTCTTttttttttttttttttgagacgg-aggtcactctgtgcgccag.....  
pan\_site1 GCCTCTTtt---ttttttttttttgagacggaggctcactctgtgcgccag.....  
\*\*\*\*\*  
P L

EXON 8B 1100 1120  
hum\_site2 AluY repeat.....agcctcttAAGGGGCACACAGTCTTGGCCTCCCCAGAGCCT  
hum\_site3 AluY repeat.....agcctcttAAGGGGCACGAGTCTTGGCCTCCCCAGAGCCT  
pan\_site3 AluY repeat.....agcctcttAAGGGGCACACAGTCTTGGCCTCCCCAGAGCCT  
hum\_site1 AluY repeat.....agcctcttAAGGGGCACGAGTCTTGGCCTCTCCGAGAGCCT  
pan\_site1 AluY repeat.....agcctcttAAGGGGCACGAGTCTTGGCCTCCCCAGAGCCT  
\*\*\*\*\*  
K G H A V L A S P R A

1140 1160 1180  
hum\_site2 CGGTCCCCGAGCAGCCCCC-GCTCTTCCCCACCCTAGCAGGTGTGCACTGCGCTCTG  
hum\_site3 CGGTCCCCGAGCAGCCCCC-GCTCTTCCCCACCCTAGCAGGTGTGCACTGCGCTCTG  
pan\_site3 CGGTCCCCGAGCAGTCCCCC-GCTCTTCCCCACCCTAGCAGGTGTGCACTGCGCTCTG  
hum\_site1 CGGTCCCCGAGCAGCCCCCT-GCTCTTCCCCACCCTAGCAGTGTGCACTGCGCTCTG  
pan\_site1 CGGTCCCCGAGCAGCCCCCT-GCTCTTCCCCACCCTAGCAGTGTGCACTGCGCTCTG  
\*\*\*\*\*  
S V P A A A P C S S P T L A V V H C A L

1200 1220 1240  
hum\_site2 ATGGCCTGGGGCTCAGCTTGTGGTCTGTCAACCGTGGGCGACCCTCCATGTGAAAtaa  
hum\_site3 ATGGCCTGGGGCTCAGCTTGTGGTCTGTCAACCGTGGGCGACCCTCCATGTGAAAtaa  
pan\_site3 ATGGCCTGGGGCTCAGCTTGTGGTCTGTCAACCGTGGGCGACCCTCCATGTGAAAtaa  
hum\_site1 ATGGCCTGGGGCTCAGCCTGTGGTCTGTCAACCGTGGGCGACCCTCCATGTGAAAtaa  
pan\_site1 ATGGCCTGGGGCTCAGCCTGTGGTCTGTCCACCGTGGGCGACCCTCCATGTGAAAtaa  
\*\*\*\*\*  
M G L G L S L W F C Q P W A T L H V K

**Supplementary Figure 2.** The alignment includes CA XV in eight species and additionally the hypothetical protein produced from human *CA15* pseudogene copy 1 (Hs1), in which frameshifts, splicing problems and the AluY insert have been ignored to reconstruct the maximal amount of the protein sequence. The yellow color indicates those residues that are conserved in all other species but have changed in our protein reconstruction. In addition, green color highlights the region that would disrupt the active site of CA XV. The abbreviations are the same as used in Figure 1.

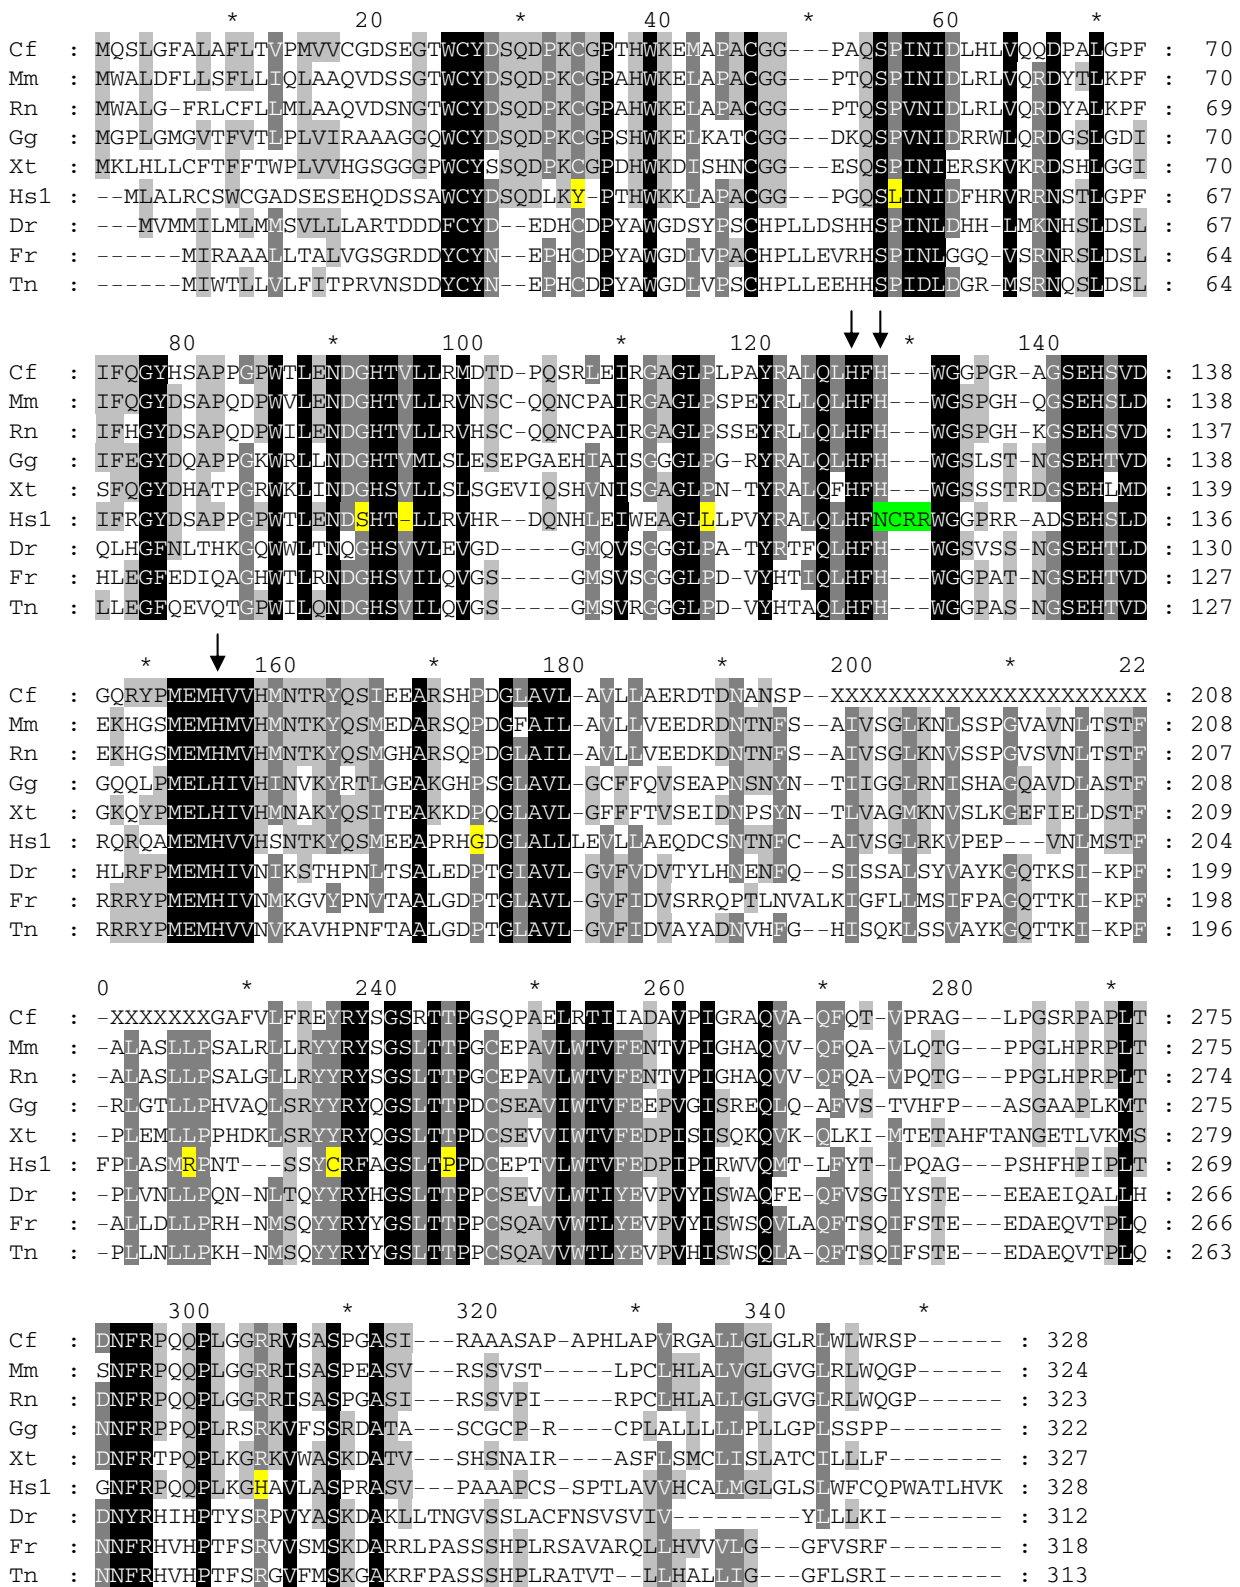

**Supplementary Figure 3.** Alignment of hypothetical transcripts to human chromosome 22. Three transcript predictions from Ensembl (corresponding to three copies of CA XV in the human genome, ENSTnnnn), one RefSeq prediction (XM\_377696) and our final reconstruction (hum1\_site1\_mRNA) were aligned to the human genome using BLAT. Results from chromosome 22 at 17.4 MB are shown. Similar hits for all five sequences can be found in chromosome 22 at 18.9 MB and 20.0 MB (data not shown). The sequences in RefSeq and Ensembl were found to be conflicting and to contain various errors due to frameshifts in the genomic sequences, which has misled automatic gene prediction programs. The direction of the sequence is shown by arrows in the intron sequences (exon 1 is on the right and 8 on the left).

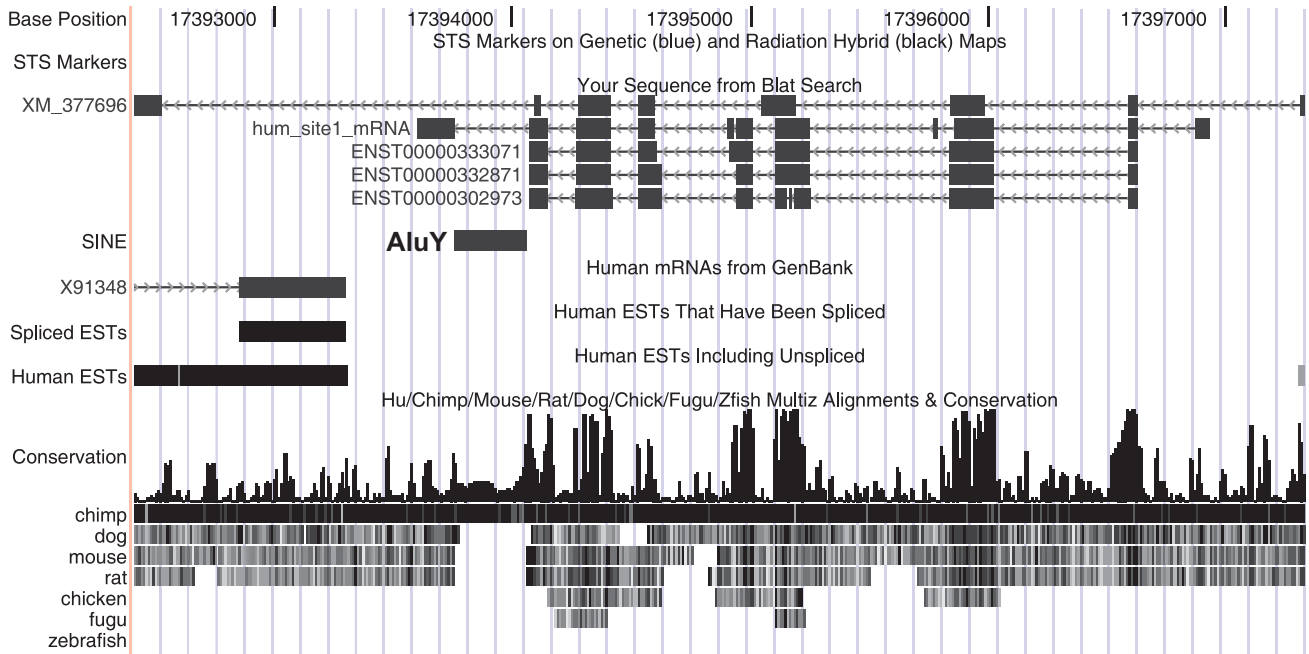

Supplement: bj3920083add.pdf [file bj3920083add.pdf]
